# Supplementary material for: Single step route to highly transparent, conductive and hazy aluminium doped zinc oxide films
Source: Royal Society of Chemistry journal article supplement (doi:10.1039/c8ra09338e), 2018-01-01
Supplement: c8ra09338e1.pdf [file c8ra09338e1.pdf]

## Single step route to highly transparent, conductive and hazy aluminium doped zinc oxide films

Jianwei Li<sup>a</sup>, Sanjayan Sathasivam<sup>a</sup>, Alaric Taylor<sup>b</sup>, Claire J. Carmalt<sup>a</sup> and Ivan P. Parkin<sup>a\*</sup>

\*Corresponding author

<sup>a</sup>Materials Chemistry Centre, Department of Chemistry, University College London, 20 Gordon Street, London WC1H 0AJ, UK

<sup>b</sup>Department of Electronic & Electrical Engineering, University College London, Torrington Place, London WC1E 7JE, UK

Fax: (+44) 20-7679-7463

E-mail: [i.p.parkin@ucl.ac.uk](mailto:i.p.parkin@ucl.ac.uk)

### Supplementary information:

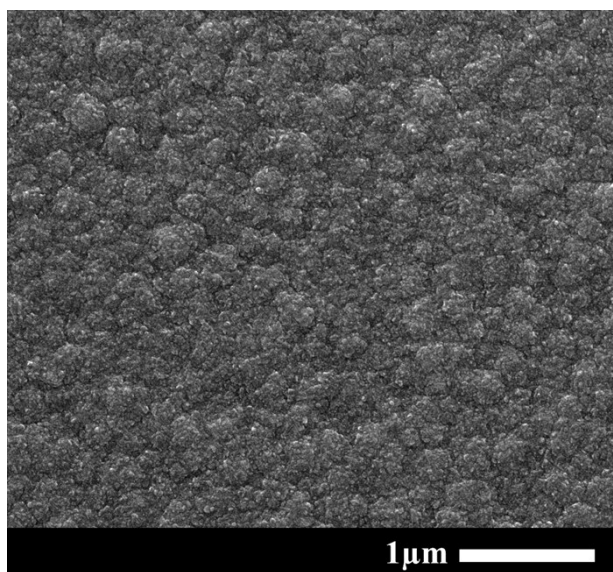

**Figure S1:** SEM image of as-prepared undoped ZnO thin film by AACVD under 500 °C without using acetylacetonate as additive in the precursor.

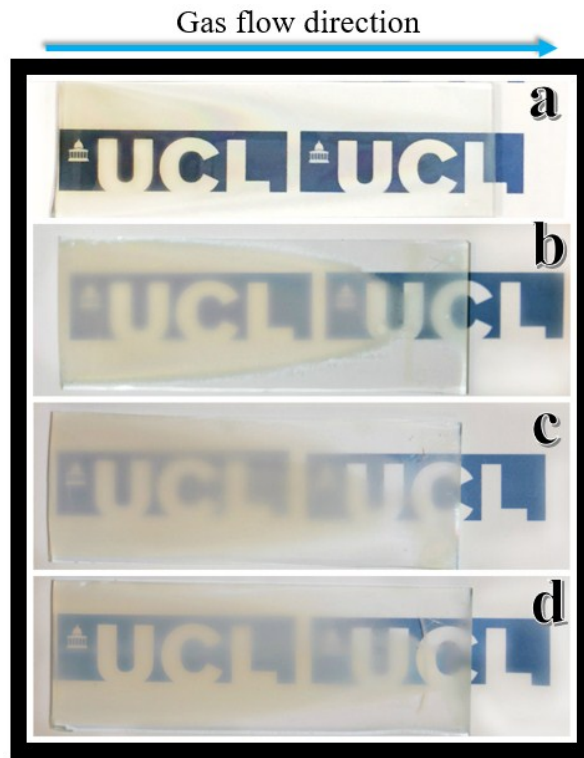

Figure S2: Digital photo showing the appearance of all as-prepared ZnO thin films : a) non-additive undoped ZnO film, b) additive treated undoped ZnO film, c) additive treated 2.9 at.% Al doped ZnO film and d) additive treated 6.1 at.% Al doped ZnO film.

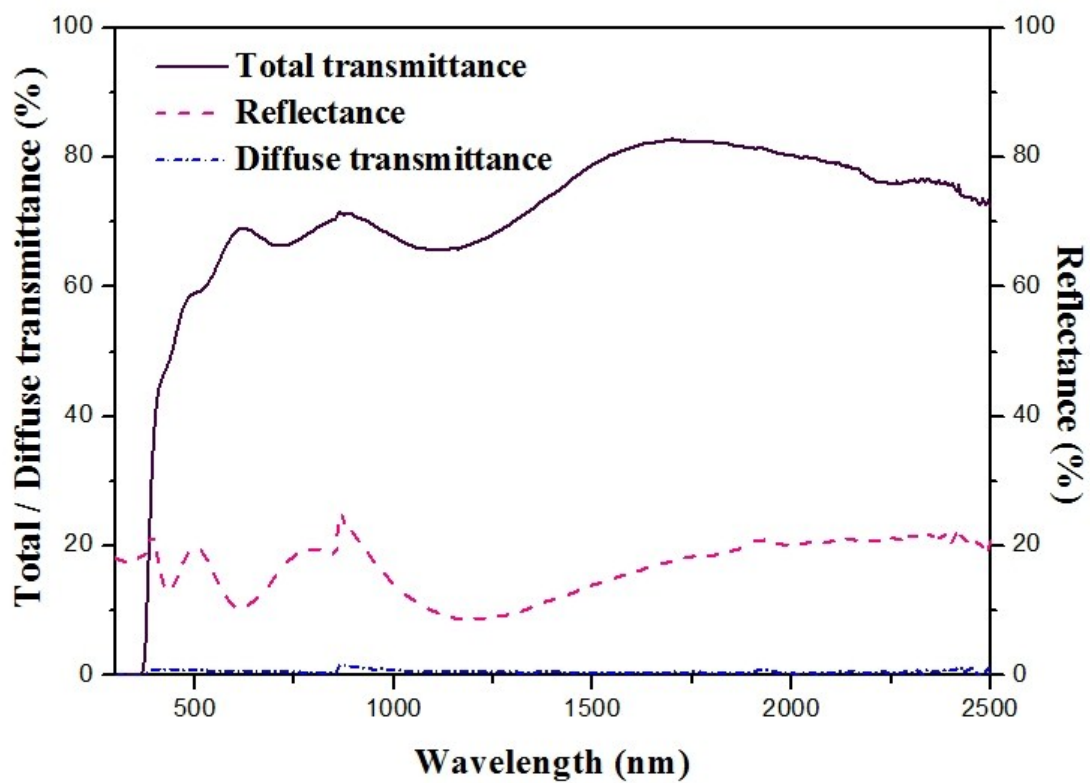

**Figure S3: Optical properties of non-additive undoped ZnO film: Total transmittance, reflectance and diffuse transmittance.**
